# Supplementary material for: Cryo-EM snapshots of mycobacterial arabinosyltransferase complex EmbB2-AcpM2
Source: PubMed Central journal article supplement (PMC7305291; doi:10.1007/s13238-020-00726-6), 2020-05-03
Supplement: 13238_2020_726_MOESM1_ESM.pdf [file 13238_2020_726_MOESM1_ESM.pdf]

## METHOD DETAILS

### Protein expression and membrane preparation

The *embB* gene (*MSMEG\_6389*) from *M. smegmatis* strain mc<sup>2</sup>155 genomic was cloned into the pMV261 vector fused to a 10 × His tag at the C-terminal of the EmbB, under the control of an acetamide promoter. Recombinant *Msm*-EmbB was transformed into *Msm* mc<sup>2</sup>155 competent cells by electroporation. Cells were cultured in large scale in 1 L Luria-Broth (LB) medium supplemented with 50 µg/mL kanamycin, 20 µg/mL carbenicillin, and 0.1% (v/v) Tween80 (to avoid cell aggregation) at 37 °C with shaking at 220 rpm until the OD<sub>600</sub> reached 1.0. Four days after induction with 0.2% (w/v) acetamide at 16 °C, the cells were collected in Buffer A containing 20 mM HEPES, 150 mM NaCl, 2 mM DTT and 5% (v/v) glycerol, pH 7.4, and lysed by passing through a French Press at 1,200 bar at 4 °C. Cell debris was cleared by centrifugation at 10000 g for 10 min at 4 °C. The membrane pellet was collected by ultracentrifugation (150,000 g, 1 h) at 4 °C then resuspended in Buffer A and stored at –80 °C until use. All mutants were expressed using the same protocol as the wild-type protein.

### Protein purification and preparation for cryo-EM

Thawed membrane fraction was solubilized with 1% *n*-undecyl-β-D-maltopyranoside (UDM; Anatrace) by gently agitating for 1.5h at 4 °C. Detergent-insoluble material was removed by ultracentrifugation (18,000 rpm, 30 min). Supernatant was purified by TALON metal affinity resin (Clontech) followed by size-exclusion chromatography using a Superose 6 Increase column (GE Healthcare) pre-equilibrated with Buffer B containing 20 mM HEPES, 150 mM NaCl, pH 7.4, and UDM at the twice critical micellar concentration (CMC). Before amphipol exchange, the peak fraction was crosslinked with

0.2% glutaraldehyde at RT for 45 min. Crosslinking was terminated by addition of Tris-  
25 HCl and then the protein was mixed with PMAL-C8 (Anatrace) at a 1:3 (w/w) dilution with  
gentle agitation at 4 °C. Detergent was removed by incubation with 20 mg/mL Bio-Beads  
SM2 (Bio-Rad) overnight at 4 °C. The Bio-Beads were then removed and eluent cleared  
by centrifugation before further separation on a Superose 6 Increase column equilibrated  
in a detergent-free buffer to remove the residual detergent and free amphipol. The peak  
30 fraction corresponding to dimeric EmbB-AcpM (at ~0.4 mg/mL) was used directly for cryo-  
EM. It should be noted that for characterization of cell-free arabinosyltransferase activity,  
the crosslinking and amphipol exchange steps were omitted and the purified complex was  
stored in an assay buffer (Buffer C) containing 50 mM MOPS, 10 mM MgCl<sub>2</sub>, pH 7.9, 5  
mM β-mercaptoethanol, 5% (v/v) glycerol and *n*-dodecyl-β-D-maltopyranoside (DDM) at  
35 the twice CMC.

### **Grid preparation and data collection**

Aliquots of the freshly purified sample were applied to glow-discharged holey carbon  
grids (Quantifoil Au R1.2/1.3). Grids were blotted for 2.5 s and flash-frozen in liquid  
40 ethane cooled by liquid nitrogen using an FEI Mark IV Vitrobot. Images were taken  
using an FEI Titan Krios electron microscope operating at 300 kV with a Gatan K2  
Summit detector at a nominal magnification of 165kx. Images were recorded in the  
super-resolution mode and binned to a pixel size of 0.82 Å. Automated single-particle  
data acquisition was performed with SerialEM (Mastronarde, 2003). Defocus values  
45 varied from 1.5 to 2.5 μm. Each stack was exposed for 6.8 s or 5.1 s with a total dose of  
60 e/Å<sup>2</sup>, with 40 frames or 32 frames per stack in each different collection batch.

## EM image processing

Among all raw cryo-EM stacks, 14,694 micrographs were generated by MotionCor2 (Zheng et al., 2017), of which around 2,382 k particles were initially picked out by  
50 Gautomatch (<http://www.mrc-lmb.cam.ac.uk/kzhang/Gautomatch>). From those particles, a series of 2D/3D classifications of RELION 2.1 (Kimanius et al., 2016; Scheres, 2012a, b) were conducted aiming to fully purify and extract suitable candidates for further refinement, around 349 k particles were left and thus subjected to further refinement, resulting in a dimer map at 4.2 Å (according to gold-standard FSC), and a protomer  
55 map of 3.9 Å with a handcrafted “half-mask” applied. All motion correction and dose-weighting procedures were performed by MotionCor2 while contrast transfer function calculation and local ctf estimation during the later stage were performed by Gctf (Zhang, 2016).

During 3D classification, it was observed that around 10% of particles exhibited a  
60 different dimer conformation compared to the rest, thus around 3,284 K particles out of 19,612 micrographs from all available stacks were assembled and subjected to a new round of processing (Figure S2) and 1,293 K particles were thereby selected after the cascade of classifications in RELION 2.1, for particles in the two conformations.

Subsequently, with initial models from previous runs in RELION 2.1, RELION  
65 refinement and further 3D classification (skip-alignment) were performed, from which two groups of particles were selected. These two groups of particles were then fed to cryoSPARC (Punjani et al., 2017) for refinement respectively, yielding an asymmetric dimer map of 3.5 Å and a pseudo-C2 dimer map of 3.6 Å. For better visualization, maps

were sharpened by the introduction of negative B-factors (Rosenthal and Henderson,  
70 2003). Local resolution variations were estimated by cryoSPARC.

### **Model building and refinement**

All residues for each protomer were set to alanine in the initial build and assigned later  
guided by secondary structure prediction of Phyre2 (Kelley et al., 2015). The protomers  
were then docked with Chimera (Pettersen et al., 2004) to form the EmbB dimers but with  
75 two different conformations, and whose models were later refined in Coot 0.8 (Emsley et  
al., 2010), while the periplasmic domain at C-terminus of the empty protomer in “active  
state” dimer was docked using the 3.9 Å EM map instead of the 3.5 Å map, due to its  
flexibility-caused shatter in this region. The AcpM homology model was obtained from the  
PDB with code 1klp and docked into the cryo-EM map using Chimera and then refined in  
80 Coot 0.8. All models were later refined in PHENIX (Adams et al., 2010) and REFMAC5  
(Murshudov et al., 2011), LocalDeblur (Ramirez-Aportela et al., 2018) was used for the  
3.5 Å EM map for enhanced interpretability. Details are shown in Table S2.

### **Transferase activity assay**

Arabinosyltransferase assays were essentially performed as described previously (Lee  
85 et al., 1997) using NV6 or NV13 (1 mM in water), DP[<sup>14</sup>C]A (100,000 cpm, stored in 1%  
IgePal), 1 mM ATP, 1 mM NADP, EmbB proteins (4 μM) or *Msm* membrane and P60  
fractions (1 mg each) and in some cases ethambutol, with the appropriate amount of  
buffer (50 mM MOPS, pH 7.9, 5 mM β-mercaptoethanol). All samples were made up to a  
final volume of 80 μL. These were incubated at 37 °C for 1 hour, quenched by the addition  
90 of 533 μL of chloroform/methanol (1:1, v/v) and mixed overnight at 4 °C. The supernatant  
was recovered following centrifugation and dried. The residue was resuspended in 2 mL

of ethanol/water (1:1, v/v) and loaded onto a 1 mL SAX SepPak and washed with 2 mL of ethanol and the eluate collected and dried. The sample was resuspended in a mixture of water-saturated n-butanol (2 mL) and water (2 mL) and the organic phase recovered.

95 The aqueous phase was re-extracted using water-saturated n-butanol (2 mL) and the organic phases pooled and re-washed with water (2 mL). The organic layer was dried and resuspended in n-butanol. The incorporation of [<sup>14</sup>C]arabinose from DP[<sup>14</sup>C]A was determined by scintillation counting and by subjecting samples to TLC using silica gel plates developed in chloroform/methanol/water/ammonium hydroxide (65:25:3.6:0.5, 100 v/v/v/v) and visualized by autoradiography using Kodak BioMAX MR films. Each assay was repeated three times.

### **Mass spectrometry**

50 µL DDM purified EmbB<sub>2</sub>-AcpM<sub>2</sub> protein was treated with 350 µL chloroform/methanol (1:1) then left overnight on ice. The suspension was converted to a bilayer by adding 105 250 µL chloroform/water (7:3) the next day. The lower organic phase was pooled after centrifugation and then dried in a speed vacuum concentrator. The dried lipids were re-dissolved in 20 µL chloroform/methanol. 1 µL of the sample was injected into QTOF (SCIEX 4600) MS coupled with UPLC (Shimadzu, 30A). After loading the sample onto the chromatography column (Waters Bioresolve Polyphenyl, 450 Å, 2.7 µm, 2.1 × 150 110 mm) the product was eluted by gradient as follows: Buffer A (0.1% formic acid 1% acetonitrile) for 1 min, then 5% to 95% Buffer B (0.1% formic acid in acetonitrile) for 3 min, then 95% Buffer B for 3.5 min. The flow rate was 50 µL/min. The mass spectrometer was operated in negative mode. The source voltage, the curtain gas, and the source temperature were set to 4500 V, 30 psi and 350 °C respectively. A SIM scan

115 (m/z: 909.6, window width: 2 da for DPA and m/z: 777.6, window width: 2 da for DP)  
followed by a MS2 scan was used to detect the targeted lipid. The collision energy was  
set to 35 eV.

### **Molecular docking**

Induced fit docking of the ethambutol to the EmbB protein was performed using  
120 Schrodinger (Friesner et al., 2004). Prior to docking, the protein structure was extracted  
from the complex structure, and was then prepared using the protein preparation wizard  
module. Protein was pre-processed, optimized and minimized using OPLS 2005 force  
field (Banks et al., 2005). All ligands were prepared through LipPrep module and all  
possible states at pH  $7 \pm 2$  were generated using ionizer and retaining specific  
125 chiralities of the molecules. At most, 1000 conformations were generated per ligand  
molecule. Initially Glide docking was carried out for each ligand. The sample ring  
conformations of ligands were selected and the side-chains were trimmed. The prime  
side-chain prediction and minimization was carried out in which residues were refined  
within 6.0 Å of ligand poses and side-chains were optimized. This led to creation of a  
130 ligand structure and conformation that is induced-fit to each pose of the protein  
structure. Finally, Glide redocking was carried out using default conditions. The ligand  
was rigorously docked into the induced-fit protein structure and the results yielded by  
Glide score for each output pose.

### **MST assay**

135 The assay was accomplished according to the previously reported method (Zhang et  
al., 2019). The binding affinity of the detergent purified EmbB for ethambutol was  
measured using a Monolith NT.115 (Nanotemper Technologies). The His-tagged protein

was labeled with RED-tris-NTA Dye according to the manufacturer's procedure. For each assay, the labeled protein at 200 nM was incubated with the same volume of  
140 unlabeled ligands at 16 different concentrations in the same buffer as the protein at room temperature for 10 min. The samples were then loaded into capillaries (Nanotemper Technologies) and measured at 25 °C by using 40% LED and medium MST power. Each assay was repeated three times.  $K_D$  values were calculated using the MO. Affinity Analysis v.2.2.4 software. All of the final plots were made using GraphPad  
145 Prism 7.0.

### **Creation of figures**

Figures of molecular structures were generated using PyMOL (The PyMOL Molecular Graphics System, Schrödinger, LLC.) (DeLano, 2010) and UCSF ChimeraX (Goddard et al., 2018).

### **150 QUANTIFICATION AND STATISTICAL ANALYSIS**

The dissociation constants ( $K_D$ ) in Microscale thermophoresis (MST) experiments were calculated using MO. Affinity Analysis v.2.2.4 software as the mean  $\pm$  SEM from three independent experiments with a single site-specific binding model for EmbB proteins with ethambutol, and Hill equation mode for AcpM protein with phospholipids.

### **155 DATA AND SOFTWARE AVAILABILITY**

All data are available in the manuscript or the supplementary materials. The accession no. for the 3D cryo-EM density maps reported in this paper is XXXX and XXXX. The PDB accession no. for the coordinates of the EmbB<sub>2</sub>-AcpM<sub>2</sub> in DPA bound and unbound states are XXXX and XXXX.

# Supplemental Figures

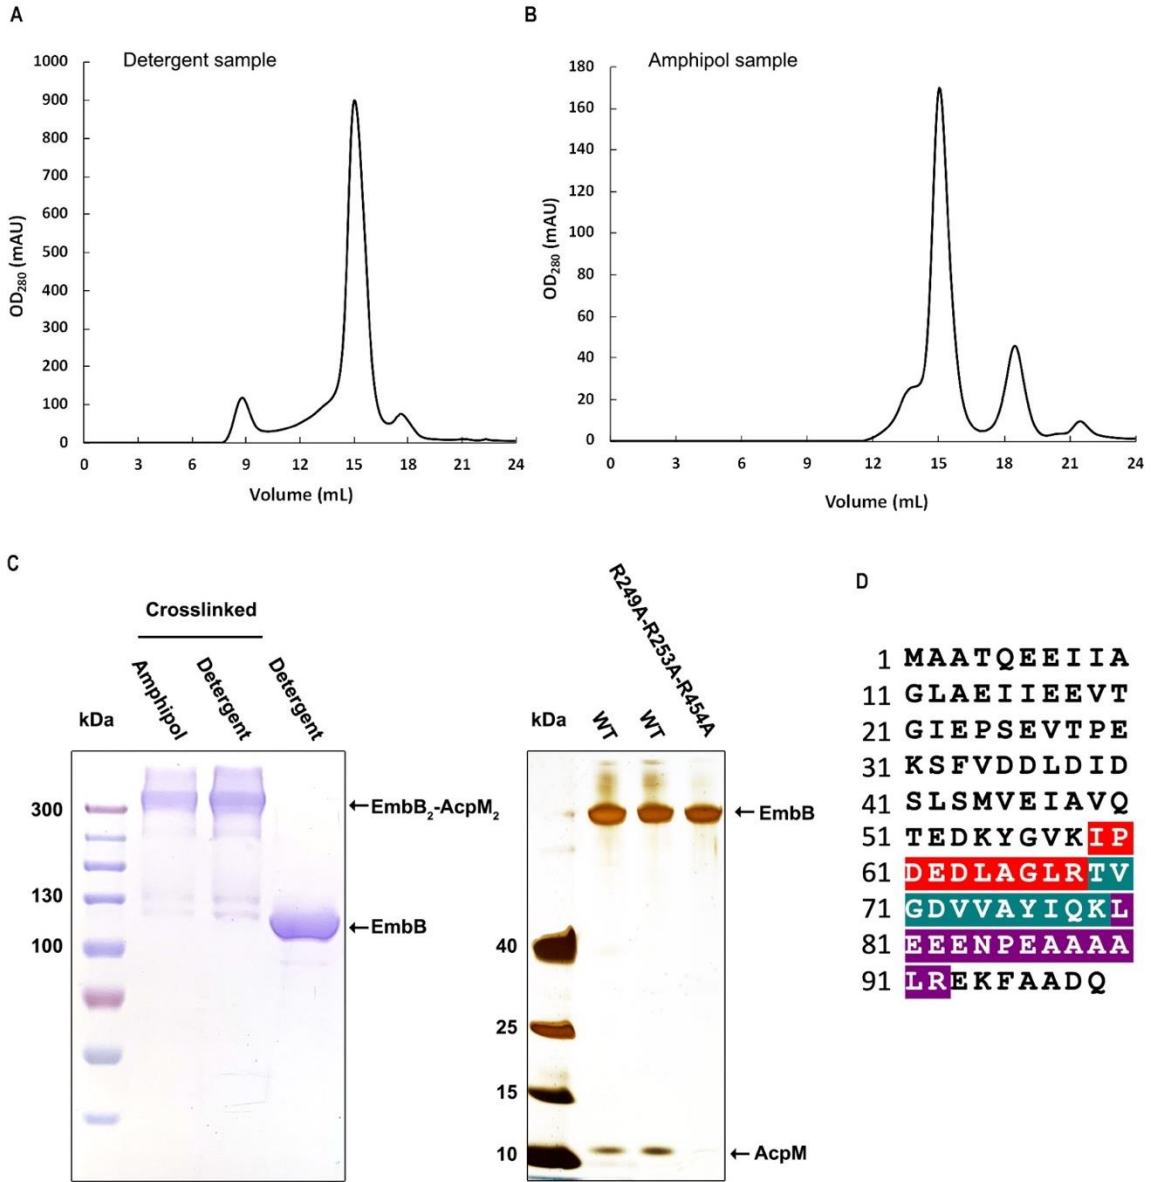



E

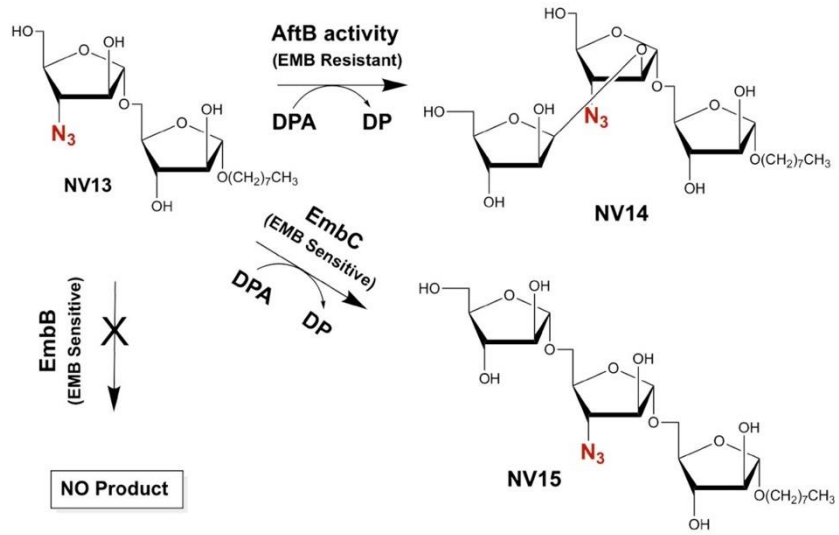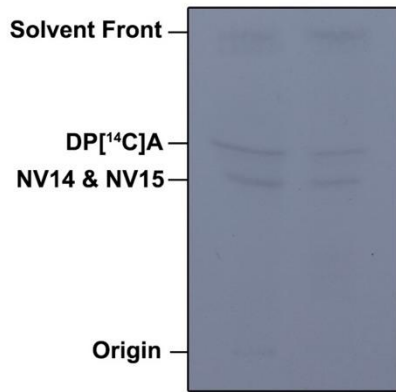

|                       |   |   |
|-----------------------|---|---|
| DP[ <sup>14</sup> C]A | + | + |
| NV13                  | + | + |
| EmbC                  | - | + |
| <i>Ms</i> -membranes  | + | - |

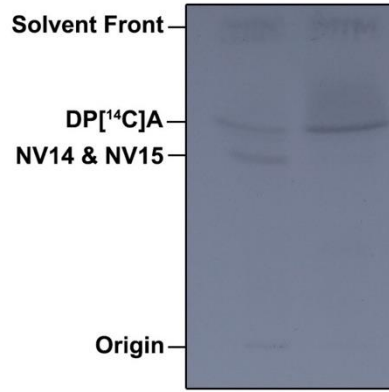

|                       |   |   |
|-----------------------|---|---|
| DP[ <sup>14</sup> C]A | + | + |
| NV13                  | + | + |
| EmbB                  | - | + |
| <i>Ms</i> -membranes  | + | - |

F

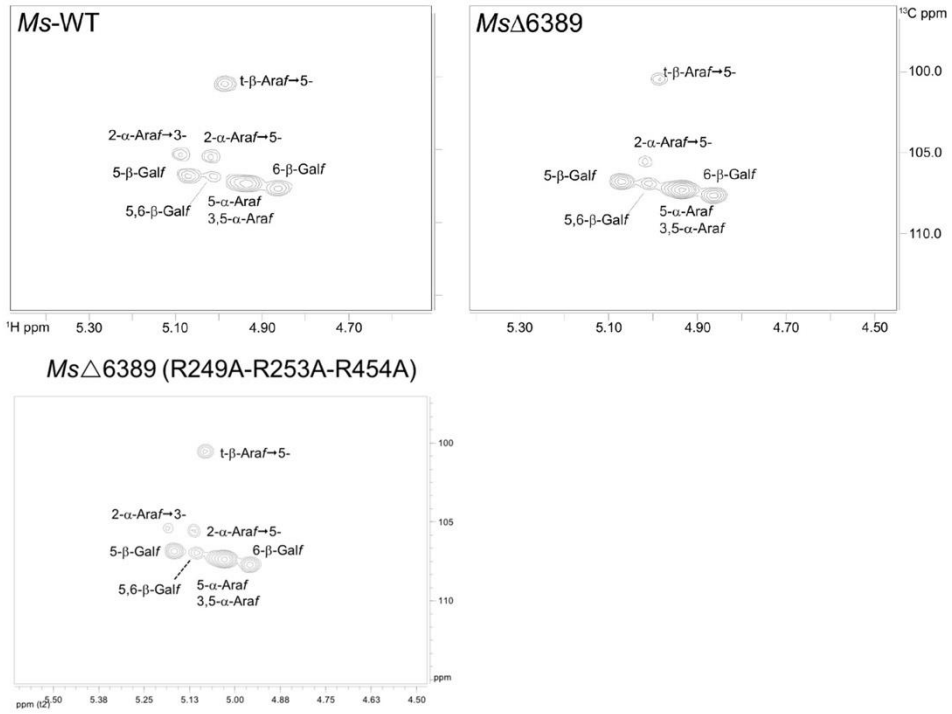

G

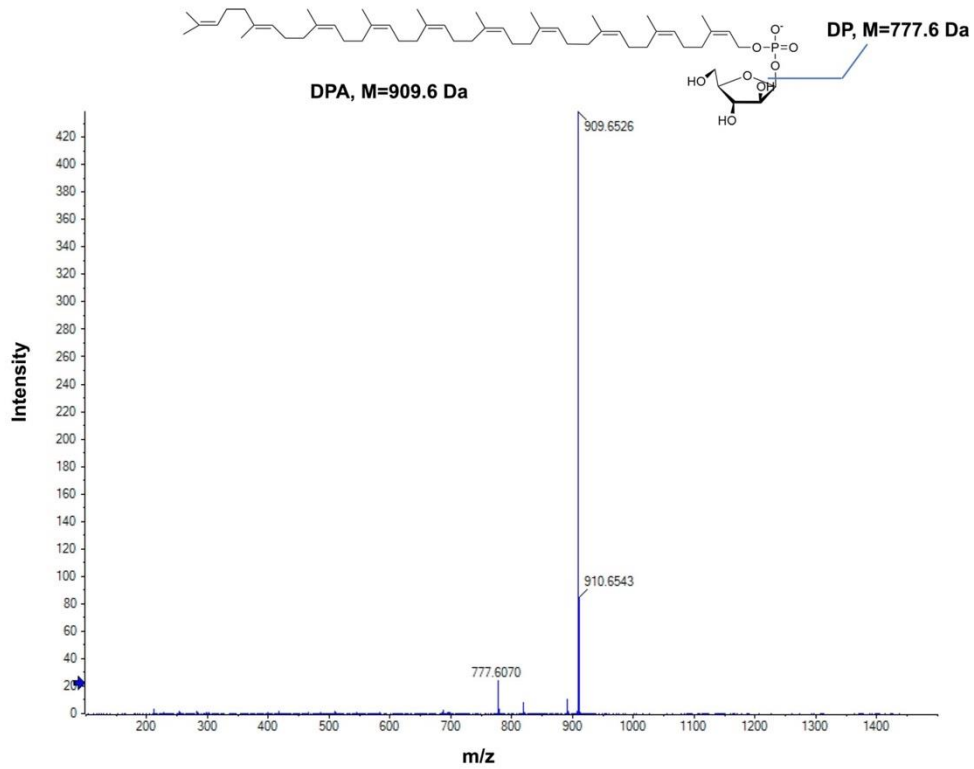

**Figure S1. Enzyme purification and characterization, related to Figures 1 and 3.**

Size-exclusion chromatography of EmbB<sub>2</sub>-AcpM<sub>2</sub> in detergent (A) and amphipol (B). (C) SDS-page of the main size-exclusion chromatography peak fraction corresponding to EmbB<sub>2</sub>-AcpM<sub>2</sub> complex imaged by Coomassie Brilliant Blue (left panel) and silver stain (right panel). WT protein on the left lane was purified following the cryo-EM sample preparation protocol while the one on the middle lane following the enzymatic activity purification protocol. (D) Peptide mass fingerprint analysis of AcpM. Identified peptides are colored in sequence. (E) Further identification of EmbB  $\alpha(1\rightarrow3)$  arabinosyltransferase activity. The 3-OH position of the terminal arabinose of NV6 was replaced by an azide group (NV13), which could not be turned over by EmbB; but could be by purified EmbC that catalyzes the formation of an  $\alpha(1\rightarrow5)$  linkage and AftB from a source of *Msm* membranes that catalyzes the formation of a  $\beta(1\rightarrow2)$  linkage. The control AftB *Msm*-membrane activity reported in each independent TLC-autoradiogram (left and right-hand panels) results from the same original assay sample split into two and was included on both plates as a reference point for AftB-activity and NV14 for the EmbC (left-hand panel) and EmbB (right-hand panel). (F) 2D-HSQC NMR spectra of purified cell wall AG from (up left) wild type *M. smegmatis* (*Ms*-WT), (up right) *M. smegmatis*  $\Delta embB$  (*Ms* $\Delta$ 6389) and (down left) *Ms* $\Delta$ 6389 complemented with a triple-alanine mutant (R249, R253, and R454). The *embB* knockout lacks the 3-arm branching at the terminus of AG. (G) Mass spectrometry analysis of solvent extracted DPA from purified *Msm* EmbB.

A

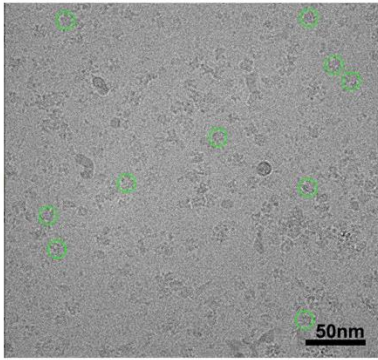

C

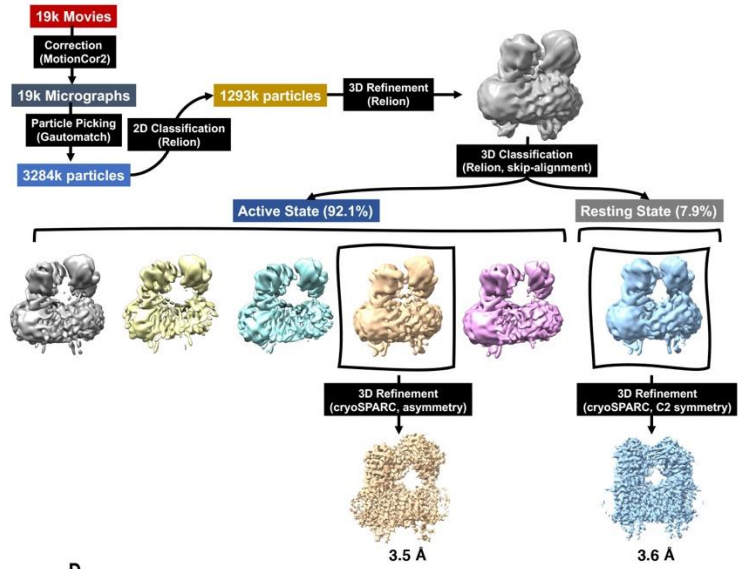

B

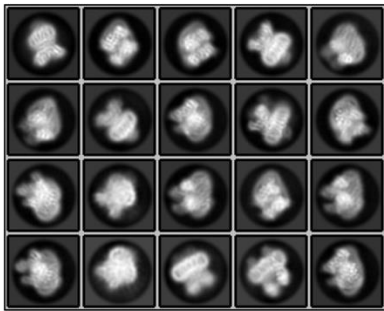

D

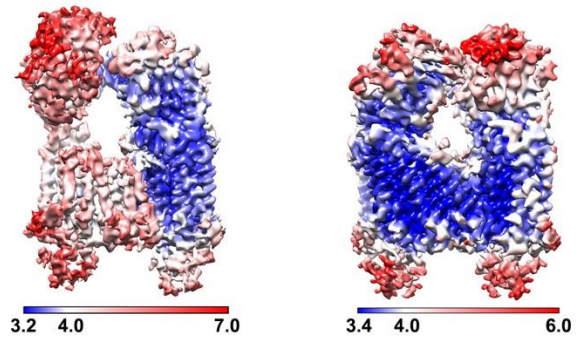

E

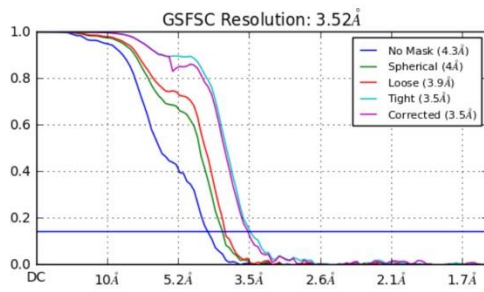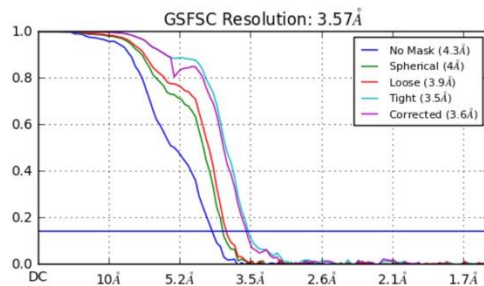

F

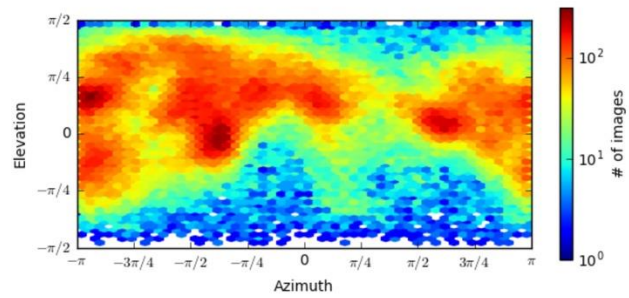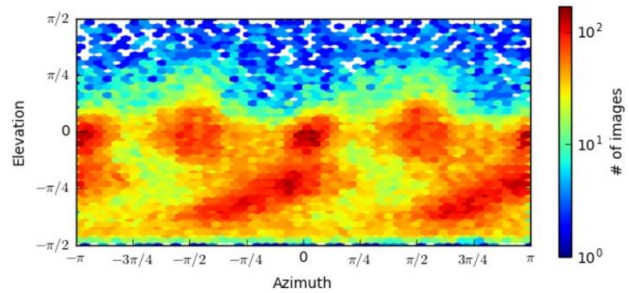

**Figure S2. Cryo-EM data processing, related to Figure 2.**

(A) Cryo-EM micrograph of EmbB<sub>2</sub>-AcpM<sub>2</sub>. (B) 2D class averages of representative orientations observed during processing. (C) Flow chart of the processing of cryo-EM data and the discovery of EmbB in two different conformations. (D) Local resolution maps calculated by cryoSPARC, sharpened with B-factor values from cryoSPARC (left: “DPA-bound” active state, right: “resting” state). (E) FSC of “DPA-bound” active state (upper panel) from the cryoSPARC reconstruction and FSC of “resting” state (lower panel) from the cryoSPARC reconstruction with C2-symmetry applied. (F) Orientation distributions in the final reconstruction from cryoSPARC (upper panel: “DPA-bound” active state, lower panel: “resting” state).

**A**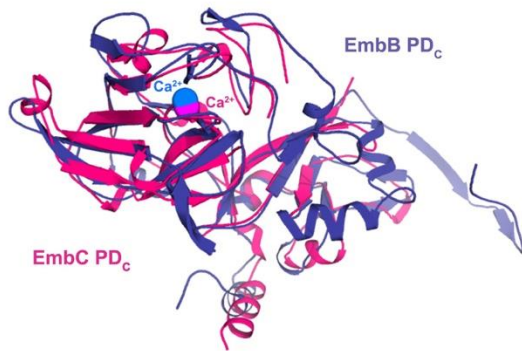**E**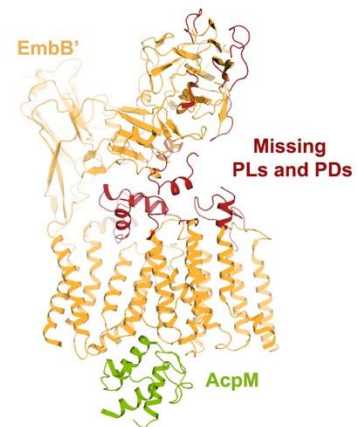**B**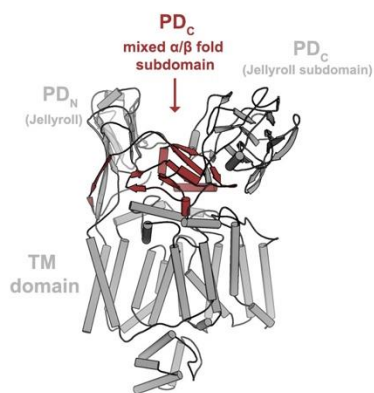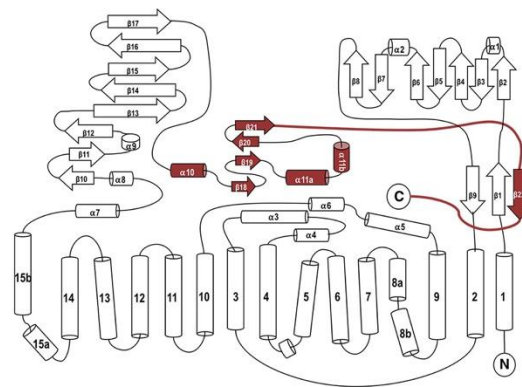**C**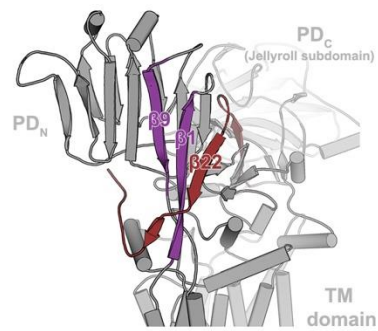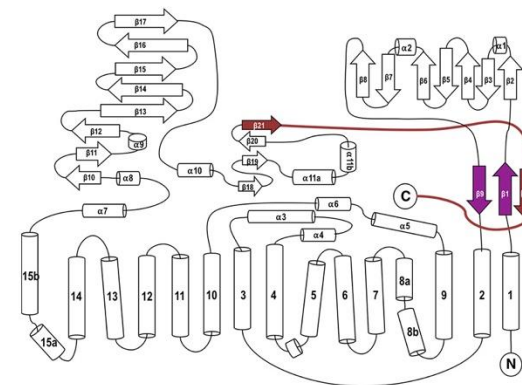**D**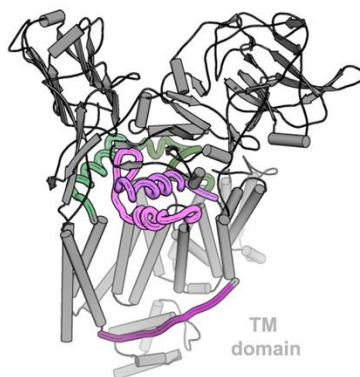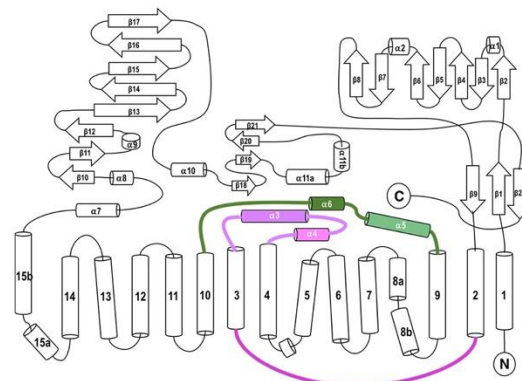

200 **Figure S3. Structural domains of EmbB, related to Figures 2 and 5.**

(A) PD<sub>C</sub> domain of the *Msm*-EmbB protomer superposed on to the C-terminal soluble domain of *Mtb*-EmbC (Alderwick et al., 2011). (B) The  $\alpha/\beta$  mixed subdomain in PD<sub>C</sub> of EmbB and its relation to the other domains. (C) Three-stranded  $\beta$ -sheet formed by PD<sub>N</sub> and the tail of PD<sub>C</sub> that stabilizes the periplasmic domain. (D) CL1 (interacting with AcpM) and PL5 (harboring catalytic motif) of DPA-bound EmbB protomer. (E) The missing PLs and PDs (red) of the unbound protomer (yellow) of the DPA-bound state.

205

A

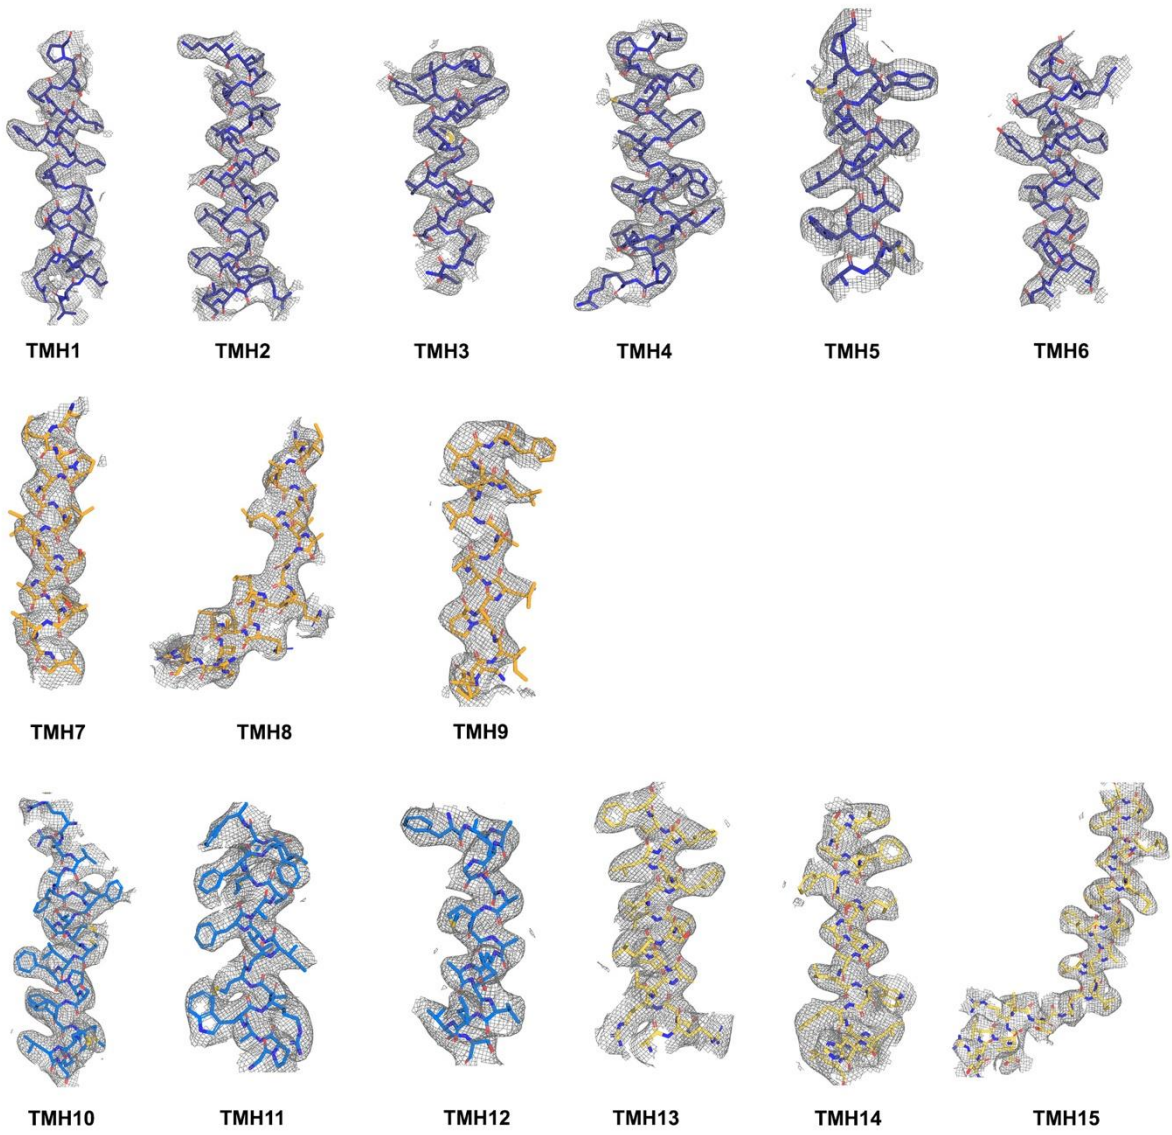

B

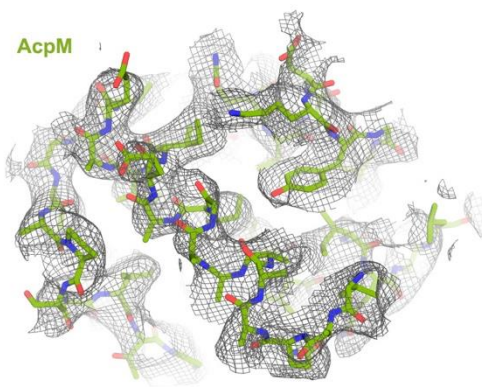

Contour level:  $2.0 \sigma$



210 **Figure S4. Representative regions of cryo-EM maps, related to Figure 2.**

Fit of the all fifteen TM helices from the protomers in the two states of the EmbB<sub>2</sub>-AcpM<sub>2</sub> complex. **(A)** TMH1-6 from the “DPA-bound” protomer of the active state. TMH7-9 from the “DPA-unbound protomer” of the active state. TMH10-12 and TMH13-15 from two protomers of “resting” state. **(B)** AcpM bound to the DPA-bound protomer in the active

215 state.

**A**

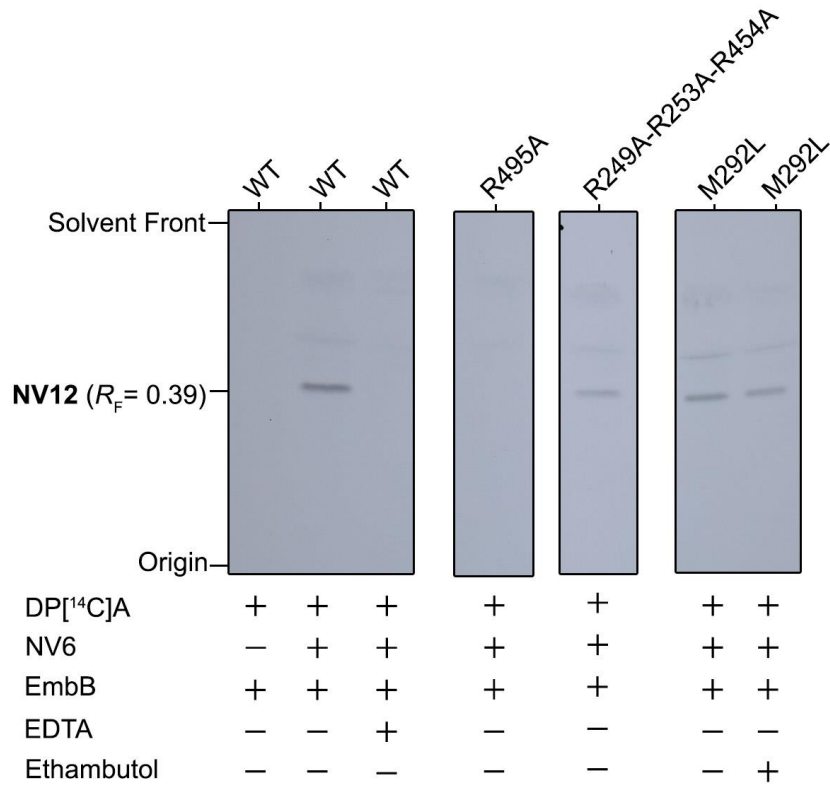

**B**

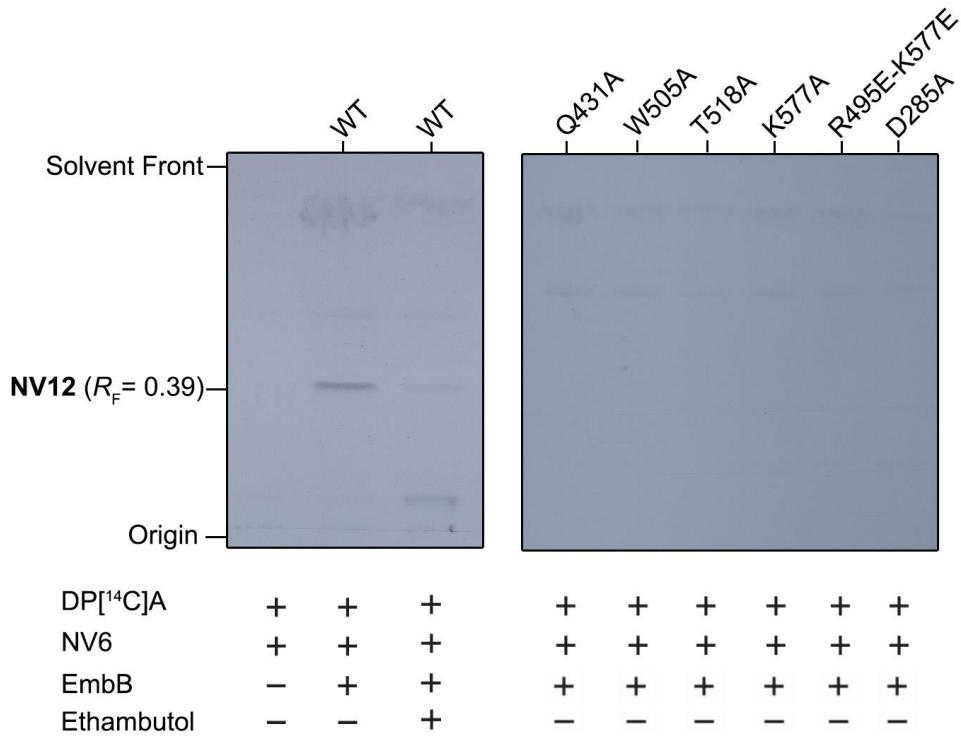

**Figure S5. EmbB and related mutated proteins in a functional arabinosyltransferase assay, related to Figures 3 and 4.**

220 (A) and (B) represent two individual experiments. To be noted, the left three control lanes in panel (B) are also referenced in Figure 1B as they came from the same experiment.

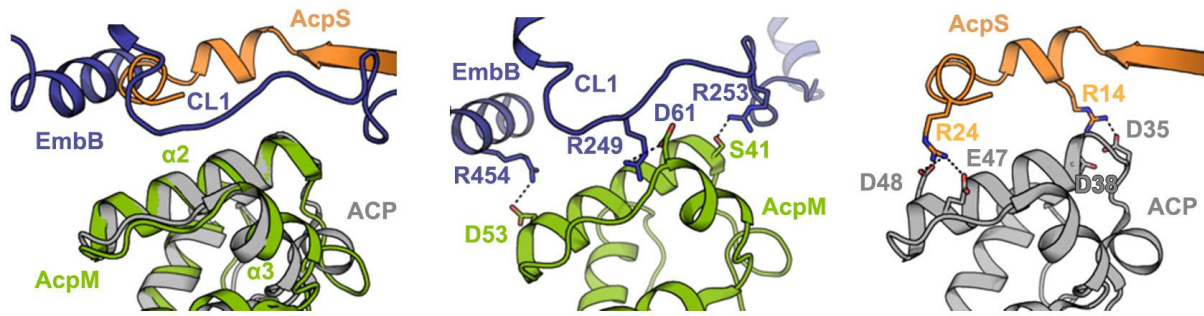

**Figure S6. Comparison of the EmbB-AcpM binding interface with the AcpS-ACP binding interface, related to Figure 4.**

225

(left) Superimposition of the AcpM in complex with EmbB (blue) and AcpS (orange) , and specific interactions of AcpM in complex with EmbB(middle) and with AcpS (right).

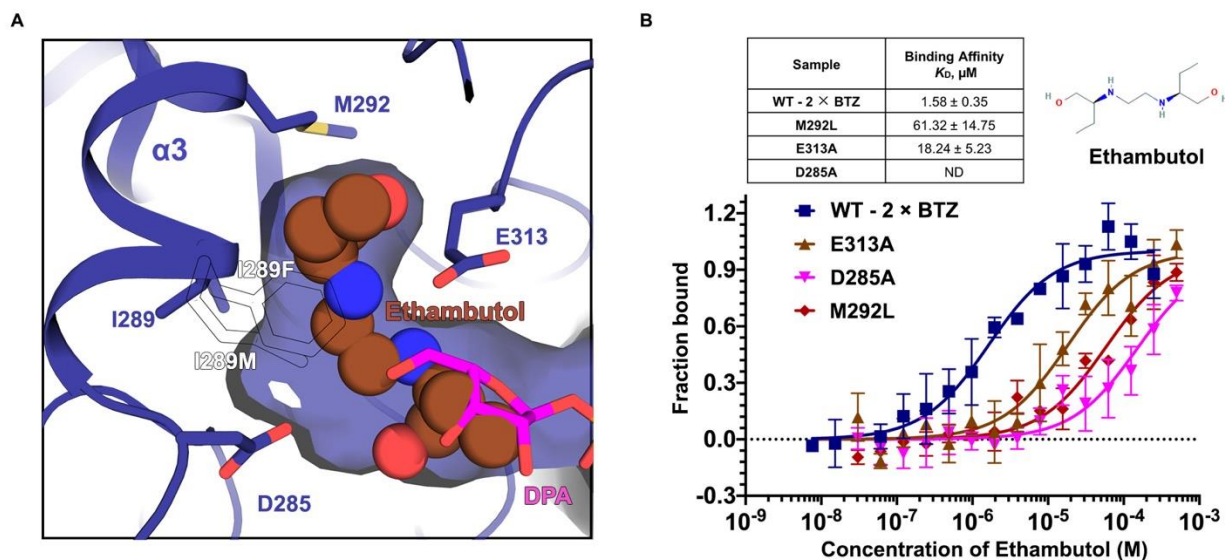

230 **Figure S7. Probing the possible binding location of ethambutol, related to Figure 7.**  
**(A)** Molecular docking of ethambutol (shown as sphere) in the DPA (in magenta) binding  
pocket (shown as surface). I289M and I289F are two mutations leading to ethambutol  
resistance in an *Msm* study. They are indicated by black-outlined side chains. It is likely  
that these changes can sterically hinder ethambutol binding. **(B)** MST assay results for  
the binding ethambutol to the EmbB mutants E313A and D285A. To be noted, the results  
235 of wild-type EmbB treated with 2  $\times$  MIC of BTZ-043 and mutant M292L in Figure 7B are  
also shown here as controls and references. They came from the same experiment with  
the mutants E313A and D285A. ND,  $K_D$  could not be determined.

```

      1      10      20      30      40      50
M.smg_embB ...MSGNMDEAVSGNMDEAVSAGKDVRIARWVATIACLLCFVLSVSIPLLPVTCATTALN
M.tub_embB ...MTQCASRRKSTPNRAILGAFASARGTRRWVATIACLLGFVLSVATPLLPVVCATTAMD
M.bov_embB ...MTQCASRRKSTPNRAILGAFASARGTRRWVATIACLLGFVLSVATPLLPVVCATTAMD
M.mar_embB ...MSVTNETEQDTAATASAREVRVTRRWVATIACLLGFVLSVATPLLPVVCATTAMLN
M.lep_embB ...MSVIYRAHRVAIANRTASRNVVAVRWVATIACLLGFVLSVATPLLPVVCATTALN
M.tub_embA ...VPHDGNERSHRIARLAAVSGIAGLLCGIVPLLPVVCATTATIF
M.smg_embA ...MTEPSRIARLAAVSGIAGLLCGIVPLLPVVCATTATVL
M.tub_embC MATEAAPRIAVRLPSTSVRDAGANVRIARYVAVAGLLGAVLAIATPLLPVVCATTALN
M.smg_embC ...MTGPHAAGGSNHRARLVAIACLLGLMAIAIATPLLPVVCATTALN

```

```

      60      70      80      90      100
M.smg_embB WPQ...QGRIDNVTAPLIISQAPLELTATVPCSVVRLDLPPEGG...LVFGTAPAEGRDA
M.tub_embB WPQ...RQQLGSVTAPLISLTPVDFATVPCDVRAMPAGG...VVLGTAPKQKDA
M.bov_embB WPQ...RQQLGSVTAPLISLTPVDFATVPCDVRAMPAGG...VVLGTAPKQKDA
M.mar_embB WPQ...NGQLNSVTAPLISLTPVNLASVPCSVVRLDLPPEGG...VVLGTAPKQKDA
M.lep_embB WPQ...NGQLNSVTAPLISLTPVDFATVPCAVVAALPPSGG...VVLGTAPKQKDA
M.tub_embA WPQGSFADGNITQITAPLIVSAPRALDISIPCSAIAIPLPANGG...LVLSLTPAGVDTT
M.smg_embA WPQGVGADGNVTELTAPLVAGAPRALDVTIPCRVAVELPADGG...VVFSTNPAGVIEA
M.tub_embC WPQ...NCTFAVSEAPLIGYVATDLNITVPCQAAAGLAGSQNTGKTVLLSTWPKQAFKA
M.smg_embC WPQ...NGVWQSVDAPLIGYVATDLNITVPCQAAAGLVGPENRNRSVLLSTWPKQAFKA

```

```

     110     120     130     140     150     160
M.smg_embB ALNAMLVNVTETRVIVRNVVASVNRDRVAG...PDCQRTEITSNLDGTYADFVGLT
M.tub_embB NLQALFVVVSAQRVDVTDNRVVILSVPREQVT...SPCQRTEIESTHAGTFANFVGLK
M.bov_embB NLQALFVVVSAQRVDVTDNRVVILSVPREQVT...SPCQRTEIESTHAGTFANFVGLK
M.mar_embB NLQALFVVVSKRVNVDNRVVILSVPREQVD...SPCQRTEIESTHAGTFANFVGLK
M.lep_embB NLNALFIDVNSQRVDVTDNRVVILSVPRNQVAGDAGAPGCSSEIESTHAGTFANFVGLT
M.tub_embA GKAGLFVVRANQDVTVVAFRDSVAVAARSTIAAG...GCSALHIVADTGGAGADFVGLP
M.smg_embA GRNGMFIIRANADVYVAFRDTVAAVAPREAVDSG...ACEIHHVADVSAVGADFVGLP
M.tub_embC VDRGLLLRANRNDLVVVRNVLVTAPLSQVLS...PTCQRLETFHAADRVAADFVGLV
M.smg_embC IDRGLLIERINNDLVIVRNTEVVSAPLEQVLS...PDCRYLTFHAADKVTGEFVGLT

```

```

     170     180     190     200     210     220
M.smg_embB QISGED.AGKIQRTGYDPNLRPAIVGVFTDITGPAPQGLSVSAEIDTRFSTHPTALMLA
M.tub_embB DPSG...APLRSFGFPDNLRPQIVGVFTDITGPAPPGLAVSATIDTRFSTRPTTLKLL
M.bov_embB DPSG...APLRSFGFPDNLRPQIVGVFTDITGPAPPGLAVSATIDTRFSTRPTTLKLL
M.mar_embB DPSG...APLRSFGFPDNLRPQIVGVFTDITGPAPPGLAVSATIDTRFSTRPTTLKLL
M.lep_embB DSAG...NPLRSGFPDNLRPQIVGVFTDITGGAPPGLAVSATIDTRFSTRPTTLKRRF
M.tub_embA GGA...LTPPEKRPQVGGIFTDIKVGAQGLSARVDIDTRFITTPGALKKA
M.smg_embA DAS...LTPVDKRPQVSGVFTDITKVPAGGLAARIDIDTRFITSPPTLTKTA
M.tub_embC QQPNAEHPGAPLRGERSGYDFRPQIVGVFTDITGPAPPGLSFSASVDTRYSSPTLTKMA
M.smg_embC QGPDDDDPGEAVRGERSGYDFRPQIVGVFTDITGPAPPGLQLSATIDTRYSTSPPTLTKLL

```

R245 G246  
R249 R250

R267  
R253

```

     230     240     250     260
M.smg_embB AMLLAVSIVIALLAWRLDRLDGR...MHRLLIPTRWRVTAVD
M.tub_embB AIIIGAVATVVALIAWRLDLDGRGSIAQLLLRPFPPASSPGMRLLIPASWRFTFTLD
M.bov_embB AIIIGAVATVVALIAWRLDLDGRGSIAQLLLRPFPPASSPGMRLLIPASWRFTFTLD
M.mar_embB AIIIGAVATVVALIAWRLDLDGR...LRSFLPANWRFTFTLD
M.lep_embB AMMLAIIITVVALVAWRLDLDGR...MRRLLIPARWMTFTLD
M.tub_embA VMLLGLAVLVAMVGAALDLRLSRGRTLRLDWT...RYRFRVRVGFASRLAD
M.smg_embA VMLLGLAVLVAMVGAALDLRGWRRFP...RTRCRAGLWTITD
M.tub_embC AMILGVALTGAALVAHLIDTADGMR...HRRFLPARWSTGGLD
M.smg_embC AMIIVGAVATVIALGAHLIDCADGR...HRRFLPARWSTGGLD

```

D299 Y302 M306 D311 N318 W322 E327 F330 Y334  
D285 Y288 M292 E297 N304 W308 E313 F316 Y320

```

     270     280     290     300     310     320
M.smg_embB GVVVGGMAIWHVIGANSSDDCYILQMARTAEHAGYMANFYRWFSGSPEDPFGWYYNVLLALM
M.tub_embB AVVIFGFLWHVIGANSSDDCYILGMARVADHAGYMSNYFRWFSGSPEDPFGWYYNLLALM
M.bov_embB AVVIFGFLWHVIGANSSDDCYILGMARVADHAGYMSNYFRWFSGSPEDPFGWYYNLLALM
M.mar_embB AVVIFGFLWHVIGANSSDDCYILGMARVADHAGYMSNYFRWFSGSPEDPFGWYYNLLALM
M.lep_embB VAVIFGFLWHVIGANSSDDCYIQMQMARTADHSYMANFYRWFSGSPEDPFGWYYNLLALM
M.tub_embA AAVIDATLLWHVIGATSSDDCYLLTIVARVAPKAGYMANFYRWFSGTTPAFDWDYTSVLAQL
M.smg_embA TGVIIGLLIWHVIGAPTSDDCYNMIIARVASEAGYNTNYRWFSGAPFDWYQSVLSHL
M.tub_embC TLVIAVLLVWHVIGANTSSDDCYILTMARVSEHAGYMANFYRWFSGTTPAFDWDYDLLALW
M.smg_embC GLVSAMLVVWHVIGANTADDCYILTMARVSEHAGYMANFYRWFSGTTPAFDWDYDLLALW

```

N296 S297  
N282 S283

Y319  
Y305

D328  
D314

**D345 S347**    **D354**    **E368**    **E378 S380**    **P397**  
**D331 S333**    **D340**    **E354**    **A364 S366**    **P383**

330    34    350    360    370    380

M. smg\_embB T K V S D A S I W I R I P D L I C A L I C W L L L S R E V L P R I G . . . P A V A G S R A A M W A A G L V L L G A W M P  
 M. tub\_embB T H V S D A S L W M R R P D L A A G L V C W L L L S R E V L P R I G . . . P A V E A S K P A Y W A A A M V L L T A W M P  
 M. bov\_embB T H V S D A S L W M R R P D L A A G L V C W L L L S R E V L P R I G . . . P A V A A S K P A Y W A A A M V L L T A W M P  
 M. mar\_embB T H V S D A S I W M R R P D L F A G L V C W L L L S R E V L P R I G . . . P A V A A S K P A N W A A A M V L L T A W M P  
 M. lep\_embB T H V S D A S M W I R I P D L I C G V A C W L L L S R E V L P R I G . . . P A I V G F K P A L W A A G L V L L A W M P  
 M. tub\_embA A A V S T A G V W M R R P A T L A G I A C W L I V S R F V L R R L C P G P G L A S N R V A V F T A G A V F L S A W L P  
 M. smg\_embA A S I S T A G V W M R R P A T A A A I A T W L I I S R C V L P R I G . . . R R V A A N R V A M L T R A G A T F L A A W L P  
 M. tub\_embC A H V S T A G V W M R R P T L A M A L T C W W V I S R E V I P R I G . . . H A V K T S R A A A W T A A G M F L A V W L P  
 M. smg\_embC A H V S T A S V W M R R P T L L M G L A C W W V I S R E V I P R I G . . . A A A K H S R A A A W T A A G L F L A E W L P

**P404 G406**    **A431**    **A439**  
**P390 E405 G392**    **A417**    **A425**  
**E391**

390    400    410    420    430    440

M. smg\_embB F N N G L R P E G Q I A L T G A L I T Y V L I E R A V T S G R L T P A A A I T T A A F T L G T Q P T C L I A V A A L L A  
 M. tub\_embB F N N G L R P E G I A L G S L V T Y V L I E R S M R Y S R L T P A A A V V T A A F T L G V Q P T C L I A V A A L V A  
 M. bov\_embB F N N G L R P E G I A L G S L V T Y V L I E R S M R Y S R L T P A A A V V T A A F T L G V Q P T C L I A V A A L V A  
 M. mar\_embB F N N G L R P E G I A L G S L V T Y V L I E R S M R Y G R L T P A A A I I S A A F T L G V Q P T C L I A V A A L V A  
 M. lep\_embB F N N G L R P E G Q I A L G A L I T Y V L I E R A I T Y G R M T P V A L A T L T A A F T I G I Q P T C L I A V A A L L A  
 M. tub\_embA F N N G L R P E P L T A L G V L T V W L V E R S I A L G R L A P A A V A I I V A T L T A T L A P O G L I A L A P L L T  
 M. smg\_embA F N N G L R P E P L T A F A V I T V W M L V E N S I G T R R L W P A A V A I V I A M F S V T L A P O G L I A L A P L L V  
 M. tub\_embC L D N G L R P E P I T A L G I L L T W C S V E R A V A T S R L L P V A A C I I G A L T L F S G P T G A S I G A L L V  
 M. smg\_embC L N N G L R P E P I T A L G I L L T W C S V E R G V A T S R L L P V A A I I I G A L T L F S G P T G T A A V G A L L V

**N399 R468**    **Q497 E504 R509**  
**N385 R460 L402 R454**    **Q483 E490 R507 R495**  
**R446 L388**

450    460    470    480    490    500

M. smg\_embB G G R P I L R I V M R R R R L V C T W P L I A P L L A A G T V I L A V V F A D O T L A T V L E A T R I R T A I G P S Q E  
 M. tub\_embB G G R P M L R I L V R R H R L V C T L P L V S P M L A A G T V I L T V V A D O T L S T V L E A T R V R A K I G P S Q A  
 M. bov\_embB G G R P M L R I L V R R H R L V C T L P L V S P M L A A G T V I L T V V A D O T L S T V L E A T R V R A K I G P S Q A  
 M. mar\_embB G G R P I L R I L V K R R R Q V C T L P L L S P M L A A G T I I L T V V A D O T L S T V F E A T R V R G K I G P S Q A  
 M. lep\_embB G G R P M L Y I L V R R H R A V C A W P L V A P L L A A G T V V L T V V A E O T L S T V L E A T K V R T A I G P A Q A  
 M. tub\_embA G A R A I A Q R I R R R R A T D C L L A P L A V L A A A L S L I T V V V E R D O T L A T V A E S A R I K Y K V G P T I A  
 M. smg\_embA G A R A I G R V V T A R R A G T C I L A S L A P L A A S V A V V F V I E R D O T L A T V A E S V R I K Y V V G P T I P  
 M. tub\_embC A I G P L R T I L H R R S R R F C V L P L V A P I A A A T V T A I P E R D O T F A G E I Q A N L L K R A V G P S L K  
 M. smg\_embC A I G P L K T I V A A H V S R F C Y W A L L A P I A A A G T V T I F L I E R D O T L A E L Q A S S F K S A V G P S L A

**W518 Y519 L530 P531 T532**  
**W504 W505 L516 P517 T518**

510    520    530    540    550    560

M. smg\_embB W W T E N L R Y Y Y L I L P T . T D C A I S R R V A F V F T A M C L F P S I F M M L R R K H T A G V A R G P A W R L M G  
 M. tub\_embB W Y T E N L R Y Y Y L I L P T . V D G S L S R R F G F L I T A L C L F T A V F I M L R R K R I P S V A R G P A W R L M G  
 M. bov\_embB W Y T E N L R Y Y Y L I L P T . V D G S L S R R F G F L I T A L C L F T A V F I M L R R K R I P S V A R G P A W R L M G  
 M. mar\_embB W Y T E N L R Y Y Y L I L P T . V D G S L S R R F G F L I T A L C L F T A V F I M L R R K R V A G V A R G P A W R L M G  
 M. lep\_embB W Y T E N L R Y Y Y L I L P T . V D G S L S R R F G F L I T A L C L F T A V L I T L R R K Q I P G V A R G P A W R L I G  
 M. tub\_embA W Y Q D F L R Y Y F L V E S N V E G S M S R R F A V L V L L F C L F G V L F V L L R R G R V A G L A S G P A W R L I C  
 M. smg\_embA W Y Q E F L R Y Y F L V E D S V D C S L T R R F A V L V L L L C L F G L I M V L L R R G R V P G A V S G P L W R L C G  
 M. tub\_embC W F D E H I R Y E R L F M A S . P D C S I A R R F A V L A L L V L A L A V S V A M S L R K G R I P G T A G P S R R I I C  
 M. smg\_embC W F D E H I R Y S R L F T S . P D G S V A R R E A V L T L L L A L A V S I A M T L R K G R I P G T A G P S R R I I C

570    580    590    600    610    620

M. smg\_embB I I F A T M F F L M F T P T K W H H F C F A A V G G A M A A I A T V L V S P T V L R S A R N R M A F L S L V L E V L  
 M. tub\_embB V I F G T M F F L M F T P T K W H H F C F A A V G A M A A L T T V L V S P S V L R W S R N R M A F L A A L F E L L  
 M. bov\_embB V I F G T M F F L M F T P T K W H H F C F A A V G A M A A L T T V L V S P S V L R W S R N R M A F L A A L F E L L  
 M. mar\_embB V I F G T M F F L M F T P T K W H H F C F A A V G A M A A L T T V L V S P T V L R W S R N R M A F L A A L F E L L  
 M. lep\_embB T I L G T M F F L T F A P T K W H H F C F A A L G A V A A L T T V L V S H E V L R W S R N R M A F L A A L F V M  
 M. tub\_embA T T A V G L L L T F T P T K W A V Q F G A F A G L A G V L G A V T A F T F A R I G L H S R N L T L Y V T A L L F V L  
 M. smg\_embA S T A I G L L L I L T P T K W A I Q F G A F A G L A G A L G V T A F A F A R V G L H S R N L A L Y V T A L L F I L  
 M. tub\_embC I T I I S F L A M M F T P T K W T H H F G V F A G L A G S L G A L A A V A V T G A M R S R N R T V F A A V V F V L  
 M. smg\_embC I T I I S F L A M M F T P T K W T H H F G V F A G L A G C L G A L A A V A V T T A M K S R N R T V F G A A V I F V T

630    640    650    660    670

M. smg\_embB A L C F A S T N G W Y V S N F C N P F N N S V P K V G G V Q I S A I F A L S A I A A L W A F W L H F T R . . . . R  
 M. tub\_embB A L C W A T T N G W Y V S S Y C V P F N S A M P K I D G I T V S T I F F A L F A T A A G Y A A W L H F A P . . . . R  
 M. bov\_embB A L C W A T T N G W Y V S S Y C V P F N S A M P K I D G I T V S T I F F A L F A T A A G Y A A W L H F A P . . . . R  
 M. mar\_embB A L C W A T T N G W Y V S S Y C V P F N S A M P K I A G I T V S T I F F L F A L A V L Y A A W L H F A P . . . . R  
 M. lep\_embB T L C F A T T N G W Y V S S Y C V P F N S A M P K I D G I T F S T I F F I L F A I V A L Y A Y L H F T N . . . . T  
 M. tub\_embA A W A T S G L N G W Y V G N Y C V P W Y D I Q P V I A S H P V T S M F L T S I L T G L A A W Y H F R M D . . . Y A  
 M. smg\_embA A W A T S G L N G W Y V G N Y C V P W F D K Q P V I A H Y P V T I F L V L A I V G G L L A G W L H F R M D . . . Y A  
 M. tub\_embC A L S F A S V N G W Y V S N F C V P W S N S F P K W R . W S L T T A L L E L T V L V L L A A W H F V A N G D G R R  
 M. smg\_embC A L S F A T V N G W Y V S N F C V P W S N S F P E F K . F G F T T M L L G L S V L A L L V A A W H F S G . . . . R

680 690 700 710 720 730

M.smg\_embB TES...R VVDRLTAA PIPVAA GFVVVMMA SMAIGVVRQYB TYSNGWANIRAFAGG..

M.tub\_embB GAGEGRLLIRALTT...APVP IVA GFMAAVFVASMVAGIVRQYB TYSNGWSNVRAFVGG..

M.bov\_embB GAGEGRLLIRALTT...APVP IVA GFMAAVFVASMVAGIVRQYB TYSNGWSNVRAFVGG..

M.mar\_embB GSSEGRLLIRALTT...APVP IAA GFMAVVFVASMGIIVRQYB TYSNGWANLRAFVGG..

M.lep\_embB GHTEGRLLIRALTT...APVP IAA GFMAVVFVASMGIIVRQYB TYSNGWANLRAFVGG..

M.tub\_embA GHTEVKNRRRRLAST PLLVVA VIMVAGEVGSMAKA AVFRYPL YTTAKANL TALSTGLS

M.smg\_embA GHTEVADTGRNRLAST PLLLIVA TIMVVLELGS MVKATVGRY VYTVGSANIAALRSAGD

M.tub\_embC TARPTFRARLAGIVQS PLAIATWLVLFV VSLTQAMISQYB AWSVGRSNLQALAGKT.

M.smg\_embC DVSPDRPQRWQRL LVA PLAVATWLVLFV VSLTGLMINQYB AWSVGRSNLALAGKT.

740 750 760 770 780

M.smg\_embB .CGLADDV LVE PDSNAG FLTFL PGAYG...PLG PLGGEDPQGFSPD GVPDRII .AEA IRL

M.tub\_embB .CGLADDV LVE PDSNAG FLTFL PGAYG...PLG PLGGVNPVGFETPNGVPEHTV .AEA IVM

M.bov\_embB .CGLADDV LVE PDSNAG FLTFL PGAYG...PLG PLGGVNPVGFETPNGVPEHTV .AEA IVM

M.mar\_embB .CGLADDV LVE PDSNAG FLTFL PGAYG...PLG PLGGVNPVGFETPNGVPEHTV .AEA IVM

M.lep\_embB .CGLADDV LVE PDSNAG FLTFL PGAYG...PLG PLGGVNPVGFETPNGVPEHTV .AEA IVM

M.tub\_embA SCAMADDV LAEPDSNAG MLOPV PGQAFG...PDG PLGGISPVGFETPNGVPEHTV .AEA IRI

M.smg\_embA SCAMADDV LAEPDSNAG MLOPV PGQAFG...PDG PLGGISPVGFETPNGVPEHTV .AEA IRI

M.tub\_embC .CGLAEDV LVE LDPNAGMLAPV TAPLA...DALCAGLSEAFETPNGIPADVT .ADP VME

M.smg\_embC .CGLAEDV LVE LDPNAGMLAPV TAPLA...DALCAGLSEAFETPNGIPADVT .ADP VME

790 800 810 820 830

M.smg\_embB NNFPQPGTDYDWNRP IKLDE...P GINGSTVP LPYGLDPKRV PVACTY STEAQ

M.tub\_embB KFNQPGTDYDWDAP TKLTS...P GINGSTVP LPYGLDPARVP LAGTY TTGAQ

M.bov\_embB KFNQPGTDYDWDAP TKLTS...P GINGSTVP LPYGLDPARVP LAGTY TTGAQ

M.mar\_embB KFNQPGTDYDWDAP TKLKT...P GINGSTVP LPYGLDPARVP LAGTY ATGQ

M.lep\_embB KFNQPGTDYDWEAP TKLKA...P GINGSTVP LPYGLDPARVP LAGTY TTGAQ

M.tub\_embA KPGLVNSDASP NKNAAITDSAGTAGGKGPV GINGSHAA LPFGLDPA RVPVMGSGYGEN.N

M.smg\_embA NPMTLPNSDGPV DKNIGIGYAAAGTGGGYGPE CVNGSRVFP LPFGLDPA RVPVMGSGYGEN.K

M.tub\_embC RFGDRSFLN.DDGLITGSEPGT.EGGTTAAP GINGSRARLPYGLDPA RVPVLGSRVAGVQ

M.smg\_embC QFGTDNFA DSDSGVVTGTEVGT.EGGTTAAA GINGSRARLPYGLDPA RVPVLGSRVRSQTQ

840 850 860 870 880 890

M.smg\_embB QESR LSAWYELPARD ETERAAH PLVVITAAGTITGESVANGLT GQTV DLEYATRGP DG

M.tub\_embB QOST LSAWYELPKPDD...GH PLVVITAAGKIAGNSVLHG YTPGQTVV LEYAMP GP.G

M.bov\_embB QOST LSAWYELPKPDD...GH PLVVITAAGKIAGNSVLHG YTPGQTVV LEYAMP GP.G

M.mar\_embB QOSRLTSAWYELPKPDD...GH PLVVITAAGKIAGNSVLHG YTPGQTVV LEYAMP GP.G

M.lep\_embB QOSRLTSAWYELPKPDD...RH PLVVITAAGKIAGNSVLHG YTPGQTVV LEYAMP GP.G

M.tub\_embA LAATATSAWYELP RSPDR...PLVVISAAGAIWSYKEDGDFIY GQSLK LQWGVGT GPDG

M.smg\_embA LAAKATSAWYELP RPTDR...PLVTVAAAGAIWYEEDEGSFNY GQSLK LQWGVHRP DG

M.tub\_embC VPAM LRSWYELP RNEQRDR...APLLVVITAAGRFD...SREVR LQWATDEQA

M.smg\_embC QPAV LRSWYELP RDRDQAG...PLLVVISAAGRFD...QGEVEV LQWATDEQAA

900 910 920 930 940 950

M.smg\_embB TLVPA GRVTFYDVG...PTPSWRNLRYP RSEIPDDAVAVR VVAEDLSLSQGDWIAVTPPRV

M.tub\_embB ALVPA GRMVPD DLYGEQPKAWRNLR FARAKMPADAVAVR VVAEDLSLTPEDWIAVTPPRV

M.bov\_embB ALVPA GRMVPD DLYGEQPKAWRNLR FARAKMPADAVAVR VVAEDLSLTPEDWIAVTPPRV

M.mar\_embB PLVA GRMVPD DLYGEQPKAWRNLR FARDKMPADAVAVR VVAEDLSLTPEDWIAVTPPRV

M.lep\_embB GLVPA GRVTFYDVG...PTPSWRNLRYP RSEIPDDAVAVR VVAEDLSLTPEDWIAVTPPRV

M.tub\_embA RIQPLGQVFPIDIG...PQP AWRNLRFP LWAAPPEADVARI VAYDPNLSPEQWFAF TPPRV

M.smg\_embA TYQALSEVQPIDIF...QQP AWRNLRFP LWAAPPEADVARI VAYDDPNLSPEQWFAF TPPRV

M.tub\_embC AGHHGGSSMEFADVG...AAP AWRNLRAP LSAIPSTATQVRLVADDDQLAPQH WIAVTPPRI

M.smg\_embC ANEPGGSI TFGDVG...AAP AWRNLRAP LSSIPPEATQIRLVASDDDLAPQH WIAVTPPRI

W988  
W972

W1028  
W1012

960 970 980 990 1000 1010

M.smg\_embB FELRQSVQ EYVGS DPV LMDWAVGLAF FPCQ QPMLHANGVT EPKFRISP DYAKLQSTDTW

M.tub\_embB FELRSLQ EYVGS DPV LLDWAVGLAF FPCQ QPMLHANGIAEIPKFRITPDYSAKKLDTDTW

M.bov\_embB PDLRSLQ EYVGS DPV LLDWAVGLAF FPCQ QPMLHANGIAEIPKFRITPDYSAKKLDTDTW

M.mar\_embB PDLRSLQ EYVGS DPV LLDWAVGLAF FPCQ QPMLHANGVTEIPKFRITPDYNAKKLDTDTW

M.lep\_embB FELRSLQ EYVGS DPV LLDWAVGLAF FPCQ QPMLHANGVT EIPKFRITPDYSAKKLDTDTW

M.tub\_embA FVLES LQR LIGSATPVLMDIATAAN FPCQ RPFSEHLGIAELPQYRILPDHKQTAASN LNW

M.smg\_embA FVLQTAO QFLGSQTPVLMDIATAAN FPCQ RPF AERLGV AELPEYRILPNFKQMVVSSNQW

M.tub\_embC ERVRLQNVVGAADP VFLDWLVGLAF FPCQ RPF GHQYGVDETPKWRILPDRFGAEANSPVM

M.smg\_embC FELR TLOEVVGS DPV LMDWLVGLAF FPCQ RPF DHR YGVV E VPKWRILPDRFGAEANSPVM



|            |   |      |   |      |   |                            |                                                                                                                                                                                                                                                             |                                                                                                                      |   |      |   |   |   |   |   |   |   |                                                                                                                               |                                              |
|------------|---|------|---|------|---|----------------------------|-------------------------------------------------------------------------------------------------------------------------------------------------------------------------------------------------------------------------------------------------------------|----------------------------------------------------------------------------------------------------------------------|---|------|---|---|---|---|---|---|---|-------------------------------------------------------------------------------------------------------------------------------|----------------------------------------------|
|            |   | 1020 |   | 1030 |   | 1040                       |                                                                                                                                                                                                                                                             | 1050                                                                                                                 |   | 1060 |   |   |   |   |   |   |   |                                                                                                                               |                                              |
| M.smg_embB | Q | D    | G | I    | N | <u>G</u> <u>G</u> <u>L</u> | <u>L</u> <u>G</u> <u>I</u> <u>T</u> <u>D</u> <u>L</u> <u>L</u> <u>L</u> <u>R</u> <u>A</u> <u>S</u> <u>V</u> <u>M</u> <u>S</u>                                                                                                                               | <u>T</u> <u>Y</u> <u>L</u> <u>S</u> <u>Q</u> <u>D</u> <u>W</u> <u>G</u> <u>D</u> <u>W</u> <u>G</u> <u>S</u> <u>L</u> | R | .    | . | K | F | D | T | V | V | <u>E</u> <u>A</u> <u>T</u> <u>F</u> <u>A</u> <u>E</u> <u>L</u> <u>D</u> <u>F</u>                                              | <u>G</u> <u>S</u> <u>Q</u> <u>T</u> <u>H</u> |
| M.tub_embB | E | D    | G | T    | N | <u>G</u> <u>G</u> <u>L</u> | <u>L</u> <u>G</u> <u>I</u> <u>T</u> <u>D</u> <u>L</u> <u>L</u> <u>R</u> <u>A</u> <u>H</u> <u>V</u> <u>M</u> <u>A</u> <u>T</u> <u>Y</u> <u>L</u> <u>S</u> <u>R</u> <u>D</u> <u>W</u> <u>A</u> <u>R</u> <u>D</u> <u>W</u> <u>G</u> <u>S</u> <u>L</u>          | R                                                                                                                    | . | .    | . | K | F | D | T | L | V | <u>D</u> <u>A</u> <u>P</u> <u>P</u> <u>A</u> <u>Q</u> <u>L</u> <u>E</u> <u>L</u>                                              | <u>G</u> <u>T</u> <u>A</u> <u>T</u> <u>R</u> |
| M.bov_embB | E | D    | G | T    | N | <u>G</u> <u>G</u> <u>L</u> | <u>L</u> <u>G</u> <u>I</u> <u>T</u> <u>D</u> <u>L</u> <u>L</u> <u>R</u> <u>A</u> <u>H</u> <u>V</u> <u>M</u> <u>A</u> <u>T</u> <u>Y</u> <u>L</u> <u>S</u> <u>R</u> <u>D</u> <u>W</u> <u>A</u> <u>R</u> <u>D</u> <u>W</u> <u>G</u> <u>S</u> <u>L</u>          | R                                                                                                                    | . | .    | . | K | F | D | T | L | V | <u>D</u> <u>A</u> <u>P</u> <u>P</u> <u>A</u> <u>Q</u> <u>L</u> <u>E</u> <u>L</u>                                              | <u>G</u> <u>T</u> <u>A</u> <u>T</u> <u>R</u> |
| M.mar_embB | E | D    | G | V    | N | <u>G</u> <u>G</u> <u>L</u> | <u>L</u> <u>G</u> <u>I</u> <u>T</u> <u>D</u> <u>L</u> <u>L</u> <u>R</u> <u>A</u> <u>H</u> <u>V</u> <u>M</u> <u>A</u> <u>T</u> <u>Y</u> <u>L</u> <u>S</u> <u>R</u> <u>D</u> <u>W</u> <u>A</u> <u>R</u> <u>D</u> <u>W</u> <u>G</u> <u>S</u> <u>L</u>          | R                                                                                                                    | . | .    | . | Q | F | E | T | L | V | <u>D</u> <u>A</u> <u>P</u> <u>P</u> <u>A</u> <u>Q</u> <u>L</u> <u>D</u> <u>L</u>                                              | <u>G</u> <u>T</u> <u>A</u> <u>T</u> <u>H</u> |
| M.lep_embB | E | D    | G | A    | N | <u>G</u> <u>G</u> <u>L</u> | <u>L</u> <u>G</u> <u>I</u> <u>T</u> <u>D</u> <u>L</u> <u>L</u> <u>R</u> <u>A</u> <u>H</u> <u>V</u> <u>M</u> <u>S</u> <u>T</u> <u>Y</u> <u>L</u> <u>A</u> <u>R</u> <u>D</u> <u>W</u> <u>G</u> <u>R</u> <u>D</u> <u>W</u> <u>G</u> <u>S</u> <u>L</u>          | R                                                                                                                    | . | .    | . | K | F | D | P | L | V | <u>D</u> <u>T</u> <u>H</u> <u>P</u> <u>A</u> <u>Q</u> <u>L</u> <u>D</u> <u>L</u> <u>D</u> <u>T</u> <u>A</u> <u>T</u> <u>R</u> |                                              |
| M.tub_embA | Q | S    | S | S    | T | <u>G</u> <u>G</u> <u>P</u> | <u>F</u> <u>L</u> <u>F</u> <u>T</u> <u>Q</u> <u>A</u> <u>L</u> <u>L</u> <u>R</u> <u>T</u> <u>S</u> <u>T</u> <u>I</u> <u>A</u> <u>T</u> <u>Y</u> <u>L</u> <u>R</u> <u>G</u> <u>D</u> <u>W</u> <u>Y</u> <u>R</u> <u>D</u> <u>W</u> <u>G</u> <u>S</u> <u>V</u> | E                                                                                                                    | Q | Y    | H | R | L | V | P | A | D | <u>Q</u> <u>A</u> <u>P</u> <u>D</u> <u>A</u> <u>V</u> <u>E</u> <u>E</u>                                                       | <u>G</u> <u>V</u> <u>I</u> <u>T</u> <u>V</u> |
| M.smg_embA | Q | S    | A | A    | D | <u>G</u> <u>G</u> <u>P</u> | <u>F</u> <u>L</u> <u>F</u> <u>I</u> <u>Q</u> <u>A</u> <u>L</u> <u>L</u> <u>R</u> <u>T</u> <u>E</u> <u>A</u> <u>I</u> <u>P</u> <u>T</u> <u>Y</u> <u>L</u> <u>R</u> <u>D</u> <u>W</u> <u>Y</u> <u>R</u> <u>D</u> <u>W</u> <u>G</u> <u>S</u> <u>I</u>          | E                                                                                                                    | R | Y    | I | R | V | V | P | Q | E | <u>Q</u> <u>A</u> <u>P</u> <u>T</u> <u>A</u> <u>I</u> <u>E</u> <u>E</u>                                                       | <u>G</u> <u>S</u> <u>T</u> <u>R</u> <u>V</u> |
| M.tub_embC | D | H    | N | G    | . | <u>G</u> <u>G</u> <u>P</u> | <u>L</u> <u>G</u> <u>I</u> <u>T</u> <u>E</u> <u>L</u> <u>L</u> <u>M</u> <u>R</u> <u>A</u> <u>T</u> <u>T</u> <u>V</u> <u>A</u> <u>S</u> <u>Y</u> <u>L</u> <u>K</u> <u>D</u> <u>D</u> <u>W</u> <u>F</u> <u>R</u> <u>D</u> <u>W</u> <u>G</u> <u>A</u> <u>L</u> | Q                                                                                                                    | R | .    | . | L | T | P | Y | Y | P | <u>D</u> <u>A</u> <u>Q</u> <u>E</u> <u>A</u> <u>D</u> <u>L</u> <u>N</u> <u>L</u>                                              | <u>G</u> <u>T</u> <u>V</u> <u>T</u> <u>R</u> |
| M.smg_embC | D | Y    | L | G    | . | <u>G</u> <u>G</u> <u>P</u> | <u>L</u> <u>G</u> <u>I</u> <u>T</u> <u>E</u> <u>L</u> <u>L</u> <u>L</u> <u>R</u> <u>P</u> <u>S</u> <u>S</u> <u>V</u> <u>P</u> <u>T</u> <u>Y</u> <u>L</u> <u>K</u> <u>D</u> <u>D</u> <u>W</u> <u>Y</u> <u>R</u> <u>D</u> <u>W</u> <u>G</u> <u>S</u> <u>L</u> | Q                                                                                                                    | R | .    | . | L | T | P | W | Y | P | <u>D</u> <u>A</u> <u>Q</u> <u>E</u> <u>A</u> <u>R</u> <u>L</u> <u>D</u> <u>L</u>                                              | <u>G</u> <u>T</u> <u>A</u> <u>T</u> <u>R</u> |

|            |          |          |          |          |          |          |          |          |          |          |          |          |          |
|------------|----------|----------|----------|----------|----------|----------|----------|----------|----------|----------|----------|----------|----------|
|            |          | 1070     |          | 1080     |          |          |          |          |          |          |          |          |          |
| M.smg_embB | <u>S</u> | <u>C</u> | <u>L</u> | <u>Y</u> | <u>S</u> | <u>P</u> | <u>G</u> | <u>P</u> | <u>L</u> | <u>R</u> | <u>I</u> | <u>R</u> | <u>P</u> |
| M.tub_embB | <u>S</u> | <u>C</u> | <u>L</u> | <u>W</u> | <u>S</u> | <u>P</u> | <u>G</u> | <u>K</u> | <u>I</u> | <u>R</u> | <u>I</u> | <u>G</u> | <u>P</u> |
| M.bov_embB | <u>S</u> | <u>C</u> | <u>L</u> | <u>W</u> | <u>S</u> | <u>P</u> | <u>G</u> | <u>K</u> | <u>I</u> | <u>R</u> | <u>I</u> | <u>G</u> | <u>P</u> |
| M.mar_embB | <u>S</u> | <u>C</u> | <u>L</u> | <u>W</u> | <u>S</u> | <u>P</u> | <u>G</u> | <u>K</u> | <u>I</u> | <u>R</u> | <u>I</u> | <u>G</u> | <u>P</u> |
| M.lep_embB | <u>S</u> | <u>C</u> | <u>W</u> | <u>W</u> | <u>S</u> | <u>P</u> | <u>G</u> | <u>K</u> | <u>I</u> | <u>R</u> | <u>I</u> | <u>K</u> | <u>P</u> |
| M.tub_embA | <u>P</u> | <u>C</u> | <u>W</u> | <u>G</u> | <u>R</u> | <u>P</u> | <u>G</u> | <u>P</u> | <u>I</u> | <u>R</u> | <u>A</u> | <u>L</u> | <u>P</u> |
| M.smg_embA | <u>F</u> | <u>G</u> | <u>W</u> | <u>S</u> | <u>R</u> | <u>G</u> | <u>G</u> | <u>P</u> | <u>I</u> | <u>R</u> | <u>A</u> | <u>L</u> | <u>P</u> |
| M.tub_embC | <u>S</u> | <u>C</u> | <u>L</u> | <u>W</u> | <u>S</u> | <u>P</u> | <u>A</u> | <u>P</u> | <u>L</u> | <u>R</u> | <u>R</u> | <u>G</u> | <u>.</u> |
| M.smg_embC | <u>S</u> | <u>C</u> | <u>W</u> | <u>W</u> | <u>S</u> | <u>P</u> | <u>A</u> | <u>P</u> | <u>L</u> | <u>R</u> | <u>L</u> | <u>S</u> | <u>.</u> |

**Figure S8. Sequence alignment of EmbB in five representative mycobacterial**

245 **species and alignment with EmbA/C in *Mtb/Msm*, related to Figures 3 and 7.**

Highly or partially conserved residues of functional importance or ethambutol resistant associated sites are identified with red arrows. All amino acids in red are from *Msm* and in blue are their equivalence from *Mtb*, clinical ethambutol resistant mutant sites are underlined.

A

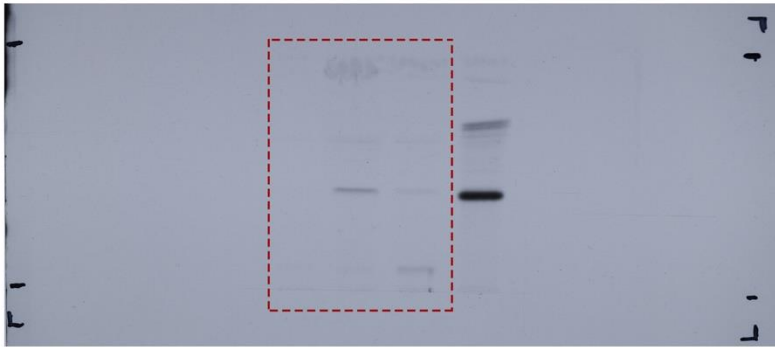

B

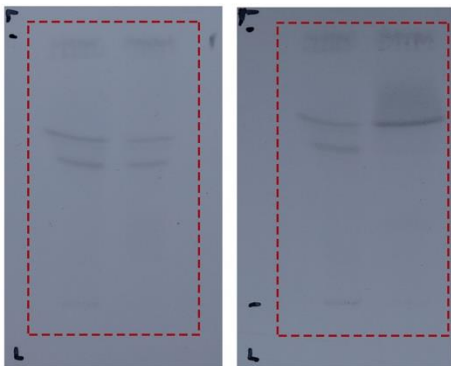

C

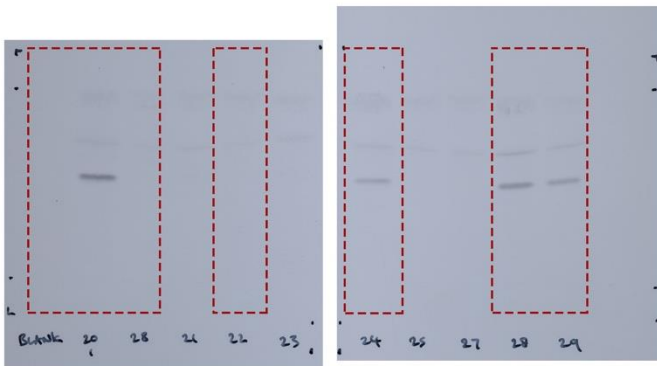

D

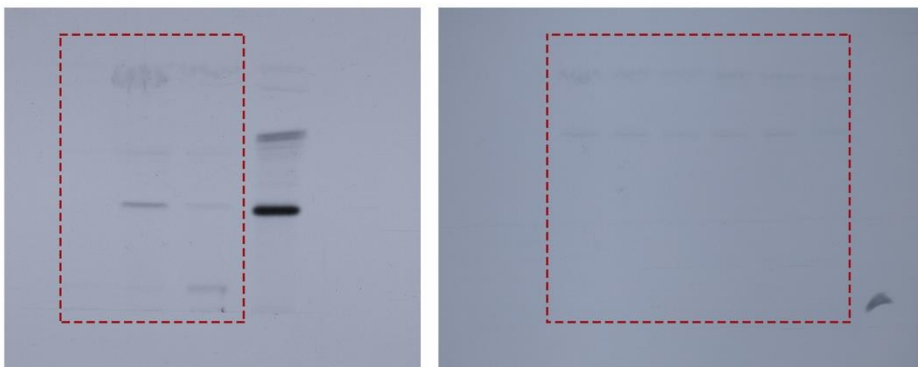

**Figure S9. The original TLC plates and how they were used to make the panel of figure 1B (A), figure S1F (B), figure S5A (C) and figure S5B (D), related to Figures 1 and S5.**

255 Red dashed boxes indicate the lanes that were extracted to assemble the panels. The left panel control in (D) was reused in panel (A) and also figure 1B to demonstrate the activity of the purified enzyme.

**Table S1. Statistics of data collection, image processing and model building**

| <b>Data Collection</b>                             |                        |           |
|----------------------------------------------------|------------------------|-----------|
| <b>EM equipment</b>                                | FEI Titan Krios        |           |
| <b>Voltage (kV)</b>                                | 300                    |           |
| <b>Detector</b>                                    | Gatan K2               |           |
| <b>Pixel Size (Å/pixel)</b>                        | 0.82                   |           |
| <b>Electron dose (e<sup>-</sup>/Å<sup>2</sup>)</b> | 60                     |           |
| <b>Defocus range (µm)</b>                          | 1.5~2.5                |           |
| <b>Reconstruction</b>                              |                        |           |
| <b>Software</b>                                    | Relion 2.1 / cryoSPARC |           |
| <b>Map Name</b>                                    | Heterodimer            | Homodimer |
| <b>Number of used particles</b>                    | 125899                 | 84483     |
| <b>Symmetry</b>                                    | C1                     | C2        |
| <b>Map sharpening B-factor (Å<sup>2</sup>)</b>     | -151                   | -166      |
| <b>Final Resolution (Å)</b>                        | 3.5                    | 3.6       |
| <b>Model Building</b>                              |                        |           |
| <b>Software</b>                                    | Coot                   |           |
| <b>Model Refinement</b>                            |                        |           |
| <b>Software</b>                                    | PHENIX                 |           |
| <b>Model name</b>                                  | Heterodimer            | Homodimer |
| <b>Map CC (whole unit cell)</b>                    | 0.79                   | 0.78      |
| <b>Map CC (around atoms)</b>                       | 0.81                   | 0.80      |
| <b>RMSD (bonds)(Å)</b>                             | 0.007                  | 0.008     |
| <b>RMSD (angles)(°)</b>                            | 1.271                  | 1.302     |
| <b>Model Composition</b>                           |                        |           |
| <b>Model name</b>                                  | Heterodimer            | Homodimer |
| <b>Protein residues</b>                            | 2064                   | 2232      |
| <b>DPA</b>                                         | 1                      | -         |
| <b>AcpM</b>                                        | 2                      | 2         |
| <b>Validation</b>                                  |                        |           |
| <b>Ramachandran plot</b>                           |                        |           |
| <b>Model name</b>                                  | Heterodimer            | Homodimer |
| <b>Outliers (%)</b>                                | 0.05                   | 0.09      |
| <b>Allowed (%)</b>                                 | 14.22                  | 11.55     |
| <b>Favored (%)</b>                                 | 85.74                  | 88.36     |
| <b>Rotamer outliers (%)</b>                        | 1.55                   | 1.37      |

**Table S2. Summary of the Model**

|                     | Protomer Name     | Chain | Total residues /Range built                                                 | Poly-ALA model              | Un-modelled residues                                                                                                                                                                          | Rigid Docking | % atomic model | Ligands | Resolution (Å) |
|---------------------|-------------------|-------|-----------------------------------------------------------------------------|-----------------------------|-----------------------------------------------------------------------------------------------------------------------------------------------------------------------------------------------|---------------|----------------|---------|----------------|
| <b>Hetero dimer</b> | EmbB Protomer 1   | A     | 1082/<br>23-168,<br>170-676,<br>678-1082                                    | -                           | 1-22, 169,<br>677                                                                                                                                                                             | -             | 97.8%          | DPA     | 3.2-5.0        |
|                     | EmbB Protomer 2   | B     | 1082/<br>23-167,<br>173-278,<br>339-489,<br>525-626,<br>647-677,<br>680-705 | 217-219,382-<br>386,647-649 | 1-22, 168-<br>172, 279-<br>338, 490-<br>524, 627-<br>646, 678-<br>679, 706-<br>732, 752-<br>760, 831-<br>834, 848-<br>851, 874-<br>879, 890-<br>901, 926-<br>928, 1004-<br>1018,<br>1075-1082 | 733-1074      | 51.8%          | -       | 3.8-7.0        |
|                     | AcpM              | C/D   | 99/<br>3-80                                                                 | -                           | 1-2, 81-99                                                                                                                                                                                    | -             | 78.8%          | -       | 3.6-6.8        |
| <b>Homo dimer</b>   | EmbB Protomer 1/2 | A/B   | 1082/<br>23-140,<br>145-502,<br>521-1082                                    | -                           | 1-22, 141-<br>144, 503-<br>520                                                                                                                                                                | -             | 95.9%          | -       | 3.4-6.0        |
|                     | AcpM              | C/D   | 99/<br>3-80                                                                 | -                           | 1-2, 81-99                                                                                                                                                                                    | -             | 78.8%          | -       | 3.7-6.0        |

265 **References and Notes:**

- Adams, P.D., Afonine, P.V., Bunkoczi, G., Chen, V.B., Davis, I.W., Echols, N., Headd, J.J., Hung, L.W., Kapral, G.J., Grosse-Kunstleve, R.W., *et al.* (2010). PHENIX: a comprehensive Python-based system for macromolecular structure solution. *Acta Crystallogr D Biol Crystallogr* 66, 213-221.
- 270 Alderwick, L.J., Lloyd, G.S., Ghadbane, H., May, J.W., Bhatt, A., Eggeling, L., Futterer, K., and Besra, G.S. (2011). The C-terminal domain of the Arabinosyltransferase *Mycobacterium tuberculosis* EmbC is a lectin-like carbohydrate binding module. *Plos Pathog* 7, e1001299.
- Banks, J.L., Beard, H.S., Cao, Y., Cho, A.E., Damm, W., Farid, R., Felts, A.K., Halgren, T.A., Mainz, D.T., Maple, J.R., *et al.* (2005). Integrated Modeling Program, Applied Chemical Theory (IMPACT). *J Comput Chem* 26, 1752-1780.
- 275 DeLano, W. (2010). The PyMOL molecular graphics system. Schrödinger, LLC, New York.
- Emsley, P., Lohkamp, B., Scott, W.G., and Cowtan, K. (2010). Features and development of Coot. *Acta Crystallogr D Biol Crystallogr* 66, 486-501.
- 280 Friesner, R.A., Banks, J.L., Murphy, R.B., Halgren, T.A., Klicic, J.J., Mainz, D.T., Repasky, M.P., Knoll, E.H., Shelley, M., Perry, J.K., *et al.* (2004). Glide: a new approach for rapid, accurate docking and scoring. 1. Method and assessment of docking accuracy. *J Med Chem* 47, 1739-1749.
- Goddard, T.D., Huang, C.C., Meng, E.C., Pettersen, E.F., Couch, G.S., Morris, J.H., and Ferrin, T.E. (2018). UCSF ChimeraX: Meeting modern challenges in visualization and analysis. *Protein Sci* 27, 14-25.
- 285 Kelley, L.A., Mezulis, S., Yates, C.M., Wass, M.N., and Sternberg, M.J. (2015). The Phyre2 web portal for protein modeling, prediction and analysis. *Nat Protoc* 10, 845-858.
- Kimanius, D., Forsberg, B.O., Scheres, S.H.W., and Lindahl, E. (2016). Accelerated cryo-EM structure determination with parallelisation using GPUs in RELION-2. *Elife* 5, e18722.
- 290 Lee, R.E., Brennan, P.J., and Besra, G.S. (1997). *Mycobacterium* arabinan biosynthesis: the use of synthetic arabinoside acceptors in the development of an arabinosyl transfer assay. *Glycobiology* 7, 1121-1128.
- Mastronarde, D.N. (2003). SerialEM: A Program for Automated Tilt Series Acquisition on Tecnai Microscopes Using Prediction of Specimen Position. *Microscopy and Microanalysis* 9, 1182-1183.
- 295 Murshudov, G.N., Skubak, P., Lebedev, A.A., Pannu, N.S., Steiner, R.A., Nicholls, R.A., Winn, M.D., Long, F., and Vagin, A.A. (2011). REFMAC5 for the refinement of macromolecular crystal structures. *Acta Crystallogr D Biol Crystallogr* 67, 355-367.
- 300 Pettersen, E.F., Goddard, T.D., Huang, C.C., Couch, G.S., Greenblatt, D.M., Meng, E.C., and Ferrin, T.E. (2004). UCSF Chimera--a visualization system for exploratory research and analysis. *J Comput Chem* 25, 1605-1612.
- Punjani, A., Rubinstein, J.L., Fleet, D.J., and Brubaker, M.A. (2017). cryoSPARC: algorithms for rapid unsupervised cryo-EM structure determination. *Nat Methods* 14, 290-296.
- 305 Ramirez-Aportela, E., Vilas, J.L., Melero, R., Conesa, P., Martinez, M., Maluenda, D., Mota, J., Jimenez, A., Vargas, J., and Marabini, R. (2018). Automatic local resolution-based sharpening of cryo-EM maps. *bioRxiv*, 433284.

- 310 Rosenthal, P.B., and Henderson, R. (2003). Optimal determination of particle orientation,  
absolute hand, and contrast loss in single-particle electron cryomicroscopy. *J Mol Biol* *333*, 721-  
745.
- Scheres, S.H. (2012a). A Bayesian view on cryo-EM structure determination. *J Mol Biol* *415*,  
406-418.
- Scheres, S.H. (2012b). RELION: implementation of a Bayesian approach to cryo-EM structure  
determination. *J Struct Biol* *180*, 519-530.
- 315 Zhang, B., Li, J., Yang, X., Wu, L., Zhang, J., Yang, Y., Zhao, Y., Zhang, L., Yang, X., Yang,  
X., *et al.* (2019). Crystal Structures of Membrane Transporter MmpL3, an Anti-TB Drug Target.  
*Cell* *176*, 636-648 e613.
- Zhang, K. (2016). Gctf: Real-time CTF determination and correction. *J Struct Biol* *193*, 1-12.
- 320 Zheng, S.Q., Palovcak, E., Armache, J.P., Verba, K.A., Cheng, Y., and Agard, D.A. (2017).  
MotionCor2: anisotropic correction of beam-induced motion for improved cryo-electron  
microscopy. *Nat Methods* *14*, 331-332.
